# Supplementary material
Source: Research Square preprint supplement (doi:10.21203/rs.3.rs-10412655/v1)
Supplement: Supplementary file 1 [file 71b6e658e9976d3fd836e67f.docx]

**Appendix A**

**Full Survey Instrument**

**Title:** AI in Bangladeshi Schools: Panic vs. Reality
**Researcher:** Sayed Mahbub Hasan Amiri

**Purpose:** This survey collects perceptions, experiences, and policy preferences about artificial intelligence (AI) tools in K‑12 education. Your responses are anonymous and will inform a national policy blueprint.

**Section 1: Background (All Respondents)**

1.1. Role:
☐ Teacher
☐ Parent/Guardian
☐ Education Officer

1.2. Division: _________________________________ District: _________________________
☐ Urban ☐ Rural

1.3. (If teacher) School type:
☐ Government ☐ Private ☐ Madrasah ☐ NGO‑run

1.4. (If parent) Highest education level completed: _____________________________________

**Section 2: Sources of Information**

2.1. How much have you heard or read about AI tools being used in schools?
☐ Nothing at all ☐ A little ☐ A moderate amount ☐ A great deal

2.2. What are your top two sources of information about AI in education? (Select up to two)
☐ Facebook / YouTube / TikTok
☐ TV news / talk shows
☐ Newspapers (print or online)
☐ Government circulars / training
☐ Colleagues / other parents
☐ My child’s school
☐ Other: __________

2.3. The information you come across about AI in education is mostly:
☐ Very negative ☐ Somewhat negative ☐ Balanced ☐ Somewhat positive ☐ Very positive

**Section 3: Measuring “Panic”**

3.1. On a scale of 1 to 5, how worried are you that AI tools in schools could harm your student’s/child’s learning and development? (1=Not at all worried, 5=Extremely worried)
☐ 1 ☐ 2 ☐ 3 ☐ 4 ☐ 5

3.2. How much do you agree with these statements? (1=Strongly disagree, 5=Strongly agree)

| a) | “AI will eventually replace human teachers.” | ☐ 1 | ☐ 2 | ☐ 3 | ☐ 4 | ☐ 5 |
| --- | --- | --- | --- | --- | --- | --- |
| b) | “Students will become dependent on AI and lose critical thinking.” | ☐ 1 | ☐ 2 | ☐ 3 | ☐ 4 | ☐ 5 |
| c) | “AI tools collect student data and that data will be misused or sold.” | ☐ 1 | ☐ 2 | ☐ 3 | ☐ 4 | ☐ 5 |
| d) | “AI tools are unfair to students from poor or rural backgrounds.” | ☐ 1 | ☐ 2 | ☐ 3 | ☐ 4 | ☐ 5 |
| e) | “The government is unable to control how private companies use AI in schools.” | ☐ 1 | ☐ 2 | ☐ 3 | ☐ 4 | ☐ 5 |

3.3. What is your greatest fear about AI in education? (Choose one)
☐ Student data privacy violation
☐ Unfair automated decisions (grading, admission)
☐ Increased screen time and mental health issues
☐ Job loss for teachers
☐ Widening the gap between rich and poor students
☐ Erosion of moral and cultural values
☐ I have no specific fear

**Section 4: Measuring “Reality”**

4.1. Does your school (or your child’s school) currently use any AI‑powered tool?
☐ Yes, actively ☐ A small pilot ☐ No ☐ I don’t know

4.2. Have you personally seen or experienced a concrete negative incident involving an AI tool in an educational setting?
☐ Yes, I have experienced it directly
☐ I know a colleague/parent whose child was affected
☐ I have only heard about it from news/social media
☐ No, I have never witnessed or experienced any such incident

4.3. (If Yes) Please briefly describe: __________________________________________

4.4. (For teachers) Have you ever used an AI tool (like ChatGPT) to prepare lessons or assess students?
☐ Regularly ☐ Occasionally ☐ Never

4.5. (For parents) Has your child ever used an AI tool for homework or study?
☐ Yes, frequently ☐ Yes, occasionally ☐ Never ☐ I don’t know

**Section 5: Policy Preferences**

5.1. Do you believe current national policies adequately address AI in schools?
☐ Yes ☐ No ☐ I am not aware of any such policy

5.2. Which action should the government prioritise? (Select one)
☐ Ban AI tools until proven safe
☐ Create mandatory AI literacy for all teachers and students
☐ Pass a strict data privacy law for children’s educational data
☐ Require independent safety audits before schools can buy AI tools
☐ Invest in free, government‑developed AI learning tools for equity
☐ No government action is needed

**Thank you. Your voice matters for an evidence‑based policy.**

**Appendix B**

**Media Content Analysis Coding Sheet**

**Purpose:** To systematically quantify the tone, evidence base, and stakeholder representation in Bangladeshi media coverage of AI in K‑12 education.
**Period:** January 2023 – July 2026
**Outlets:** The Daily Star, Prothom Alo, [bdnews24.com](https://bdnews24.com), Dhaka Tribune, Somoy TV, Channel i, ATN Bangla (YouTube segments)

| **Variable** | **Codes** | **Description** |
| --- | --- | --- |
| Article ID | Unique number | Sequential identifier |
| Date | DD‑MM‑YYYY | Publication/broadcast date |
| Source | 1=The Daily Star, 2=Prothom Alo, 3=[bdnews24.com](https://bdnews24.com), 4=Dhaka Tribune, 5=Somoy TV, 6=Channel i, 7=ATN Bangla, 8=Other (specify) | Media outlet |
| Title/Topic | Free text | Headline or brief topic description |
| Dominant Tone | 1=Panic/Fear‑framed, 2=Neutral/Balanced, 3=Opportunity/Hype‑framed, 4=Evidence‑based/Policy | Primary framing of the item |
| Risk Themes Present (select all that apply) | 1=Data privacy/security, 2=Algorithmic bias/unfairness, 3=Job loss for teachers, 4=Academic dishonesty/cheating, 5=Mental health/screen time, 6=Cultural/moral erosion, 7=Digital divide/inequity, 8=No specific risk mentioned | Up to three main risk themes coded |
| Opportunity Themes Present (select all that apply) | 1=Personalised learning, 2=Teacher support/workload reduction, 3=Access for marginalised/rural students, 4=21st‑century skill development, 5=Administrative efficiency, 6=National competitiveness, 7=No opportunity mentioned | Up to three main opportunity themes coded |
| Empirical Evidence Cited? | 0=No, 1=Yes – from Bangladesh, 2=Yes – from global sources | Reference to study, survey, pilot, government report, or named expert data |
| Source of Evidence (if any) | Free text | e.g., “a2i pilot,” “UNESCO report” |
| Does the article mention any existing or proposed policy? | 0=No, 1=Mentions Bangladeshi policy, 2=Mentions foreign/international policy | Policy awareness indicator |
| Quoted Stakeholders | 1=Government official, 2=Teacher/Teacher union, 3=Parent, 4=Student, 5=EdTech vendor, 6=Academic/Researcher, 7=Civil society/Activist, 8=No human source | Who shapes the narrative? |
| Visuals/Images | 1=Disturbing/fear‑inducing, 2=Neutral, 3=Optimistic/human‑AI collaboration, 4=No image | Visual framing |
| Coder Notes | Free text | Additional context or nuance |

**Inter‑coder reliability:** A 20% overlap sample was independently coded by two native Bangla speakers; disagreements were resolved through discussion. Krippendorff’s alpha > 0.80 for all key variables.

**Appendix C**

**Interview Guides**

**C.1 Teachers (Urban/Rural, Government/Private/Madrasah)**

1. Tell me about your school and the technology you use daily.
2. What does a typical day look like when you use a digital or AI tool?
3. Some say AI will ruin education; others say it is the only way forward. What do you think?
4. Have you ever felt pressured to use or avoid a particular AI tool? By whom?
5. Have you noticed any students behaving differently because of an AI tool more engaged, anxious, or dependent?
6. Have you ever seen an app or AI tool give wrong, biased, or inappropriate feedback?
7. Were there any instances of student data being mishandled, even accidentally?
8. If the government could do one thing to make AI safer and more useful in your classroom, what would it be?
9. Should training on AI be mandatory? What kind of training would help you?
10. Do you feel you have the authority to question a software’s decision, like a grade? Why or why not?

**C.2 Parents/Guardians**

1. What technology does your child’s school use? How do you feel about it?
2. Where do you usually hear news about AI and education?
3. What is your biggest worry about AI in your child’s learning?
4. Has your child ever come to you with a concern about an app or online platform?
5. Some parents worry about data being sold. How much does that concern you?
6. What would make you trust an AI tool recommended by the school?
7. Should the government test these tools before allowing them in classrooms?
8. If you had to choose, what is more important: better learning through AI or guaranteed privacy and safety?

**C.3 Education Officers / Officials**

1. What guidance exists about AI or digital platforms in schools?
2. Have you ever received a complaint about an edtech tool? What happened?
3. When a school wants to buy a learning app, what checks are in place?
4. Is there any requirement for companies to prove their tool is safe or effective?
5. If a national policy required algorithmic impact assessments, would that be feasible at your level? What support would you need?
6. What is the biggest barrier money, training, or political will to regulating AI in education?

**C.4 EdTech Vendors**

1. What responsible design practices do you follow, especially regarding fairness and children’s data?
2. Have you ever conducted an internal audit of your AI for bias? Why or why not?
3. Would you support a mandatory third‑party audit requirement for AI tools used in government schools? What would make it fair for companies?

**Appendix D**

**Informed Consent Form (English and Bangla)**

*Identical to the bilingual consent form provided earlier in Part A of the direct research section. For brevity, it is summarised here as a template reference.*

- Research title, purpose, voluntary participation, confidentiality, audio recording consent, withdrawal rights, signature lines.

**Appendix E**

**Sample Right to Information (RTI) Applications and Responses**

**E.1 RTI Application to Directorate of Secondary and Higher Education (DSHE)**

Date: 10 April 2026
To: The Designated Officer, DSHE, Dhaka

Under the Right to Information Act 2009, I request the following information:

1. Has any algorithmic impact assessment, fairness audit, or data privacy audit been conducted on any AI‑powered educational technology tool (including adaptive learning platforms, automated grading systems, or AI‑based personalised tutoring applications) used in government secondary schools from 2020 to date? If yes, please provide copies of all such assessment/audit reports.
2. Does the DSHE procurement manual or any circular require vendors of educational software to submit evidence of algorithmic fairness, data protection compliance, or independent safety certification before a purchase order is issued? If yes, please provide copies of the relevant provisions.
3. Has any complaint been received from a school, teacher, parent, or student regarding data breaches, privacy violations, biased automated decisions, or inappropriate content linked to an AI or digital learning tool? If yes, please provide a summary of complaints and actions taken.

**E.2 RTI Response from DSHE (received 20 May 2026)**

Ref: DSHE/RTI/2026/214

Sir/Madam,
In response to your application dated 10 April 2026, the following information is provided:

1. The Directorate of Secondary and Higher Education does not possess any record of an algorithmic impact assessment, fairness audit, or data privacy audit conducted on AI‑powered educational technology tools used in government secondary schools. No such requirement currently exists in our procurement regulations.
2. The existing procurement manual for digital equipment and software requires vendors to submit technical specifications, warranty documents, and price quotations. There is no specific provision mandating evidence of algorithmic fairness, data protection compliance, or independent safety certification for AI‑based tools.
3. No formal complaint has been registered in the DSHE complaint database specifically concerning AI‑related data breaches, privacy violations, or biased automated decisions by an educational technology tool. Complaints regarding digital content are occasionally received at the district level, but a centralised category for algorithmic harm does not exist in our system.

Designated Officer, DSHE

**E.3 RTI Application to a2i Programme Office**

Date: 12 April 2026
To: The Designated Officer, a2i, ICT Division, Dhaka

Under the Right to Information Act 2009, I request:

1. Has any algorithmic impact assessment or independent fairness audit been conducted on the AI‑based personalised learning tools (AI Tutor) piloted by a2i in government schools? If yes, please provide the reports. If no, please state the reason.
2. Please provide any monitoring and evaluation data that disaggregates student learning outcomes from the AI‑tutor pilots by gender, urban/rural location, and language of instruction.
3. Does a2i maintain a list of all third‑party AI or edtech tools deployed in schools under its programmes, including data‑sharing agreements? If yes, please provide the list.

**E.4 RTI Response from a2i (received 25 May 2026)**

Ref: a2i/RTI/2026/89

Sir/Madam,
In response to your application dated 12 April 2026:

1. a2i has conducted internal monitoring and evaluation of the AI‑tutor pilots, focusing on learning outcome improvements, user engagement, and teacher feedback. No independent algorithmic impact assessment or fairness audit has been commissioned. The reason is that the existing programme framework and budget did not include a provision for such audits, and no government regulation required one.
2. Disaggregated evaluation data from the pilots, where available, are attached as Annexure A. It shows that learning gains in mathematics were observed in pilot schools. However, the pilot tools were primarily in English and required stable internet connectivity, which limited their effectiveness in rural and Bangla‑medium environments.
3. a2i maintains project‑level records of all digital tools deployed under its education programmes. A summary list with tool names and data‑sharing agreement summaries is attached as Annexure B. No centralised public‑facing registry exists.

Designated Officer, a2i

**Appendix F**

**Proposed Algorithmic Impact Assessment (AIA) Template for Bangladesh (Draft)**

**Purpose:** This template is to be completed by any vendor or procuring entity seeking to deploy an AI‑powered educational technology tool in a government or government‑assisted K‑12 school in Bangladesh. It shall be submitted in Bangla and English.

**Tool Name:** ___________________________________________________________________
**Vendor Name:** _________________________________________________________________
**Date of Submission:** ____________________________________________________________

**Instructions:** Answer all questions. Attach supporting evidence where indicated. The assessing authority will assign a risk score (Low/Moderate/High) to each domain and an overall risk classification.

**Domain 1: Purpose and Educational Necessity**

1.1. Describe the specific educational need this tool addresses.
1.2. Explain why an AI‑powered solution is necessary; could a less intrusive alternative achieve the same goal?
1.3. Provide evidence of the tool’s pedagogical effectiveness (e.g., pilot studies, peer‑reviewed research, or local evaluation data).

**Domain 2: Data Governance**

2.1. List all categories of data the tool collects (e.g., name, age, location, academic performance, behavioural patterns, biometric data, voice recordings).
2.2. For each data category, state the purpose of collection, the legal basis under the Data Protection Act 2023, and the retention period.
2.3. Where is the data stored? (Specify country and whether servers are located in Bangladesh.)
2.4. Is any data shared with third parties? If yes, provide the names of all recipients and the purposes of sharing.
2.5. Describe the consent mechanism for students and parents. How is consent obtained, and can it be withdrawn?
2.6. Has the tool undergone a data protection impact assessment? If yes, attach the report.

**Domain 3: Algorithmic Fairness**

3.1. Describe the demographic composition of the data used to train the AI model (age, gender, language, geography, socioeconomic indicators).
3.2. Has the tool been tested for performance disparities across gender, socioeconomic status, language, rural/urban location, or disability? If yes, attach the test results. If no, explain why.
3.3. What measures have been taken to mitigate identified biases?
3.4. Does the tool make or assist in decisions that significantly affect a student’s educational trajectory (e.g., grading, placement, disciplinary action)? If yes, describe the decision logic in plain language.

**Domain 4: Linguistic and Cultural Accessibility**

4.1. In which languages does the tool operate? Is full functionality available in Bangla?
4.2. Has the content been reviewed for cultural appropriateness in the Bangladeshi context? By whom?
4.3. Does the tool accommodate learners with visual, hearing, or cognitive disabilities? Describe the accessibility features.

**Domain 5: Transparency and Explainability**

5.1. Can a teacher, parent, or student understand how the tool arrives at its outputs? Provide a plain Bangla explanation of the algorithm’s logic.
5.2. Does the tool provide a mechanism for users to contest or seek review of automated decisions? Describe the process.
5.3. Are there any functions of the tool that operate as a “black box” without explainable outputs? If yes, list them.

**Domain 6: Human Oversight**

6.1. Is the tool designed to augment or replace teacher judgment? Explain.
6.2. Does the teacher retain the authority to override the tool’s recommendations? How?
6.3. What training or support does the vendor provide to ensure effective human oversight?

**Risk Classification (for official use only):**

| **Domain** | **Risk Score (Low/Moderate/High)** |
| --- | --- |
| Purpose and Necessity |  |
| Data Governance |  |
| Algorithmic Fairness |  |
| Linguistic/Cultural Accessibility |  |
| Transparency and Explainability |  |
| Human Oversight |  |
| Overall Classification |  |

**Conditions of Approval:** (To be specified by the assessing authority, e.g., “Biennial third‑party audit required,” “Equity impact plan must be submitted within six months.”)

**Assessing Officer Signature:** _____________________________________________________
**Date:** ________________________________________________________________________

These appendices complete the evidentiary and procedural documentation for the article, enabling replication, regulatory adaptation, and full transparency of the research underpinning the five‑pillar blueprint.
